# Supplementary material for: Cigarette smoke alters calcium flux to induce PP2A membrane trafficking and endothelial cell permeability
Source: PubMed Central journal article supplement — Sci Rep. 2024 Nov 14;14:28012. doi: 10.1038/s41598-024-77776-x (PMC11564810; doi:10.1038/s41598-024-77776-x), 2024-11-14
Supplement: 41598_2024_77776_MOESM1_ESM.pdf [file 41598_2024_77776_MOESM1_ESM.pdf]

# Supplementary Figure 1.

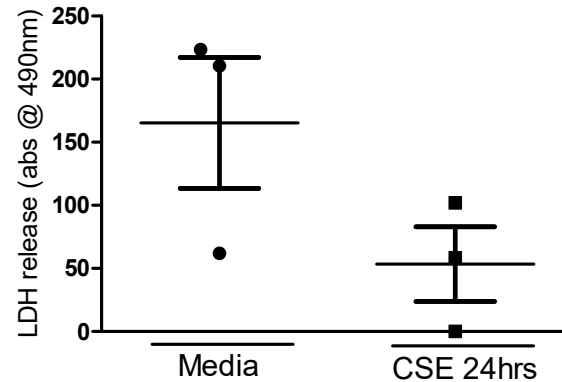

**Supplementary Figure 1. The effect of cigarette smoke extract on endothelial cell viability.** Human microvascular endothelial cells were treated with media alone or media supplemented with 5% cigarette smoke extract (CSE) for 24 hours. LDH levels were measured in the media at the 24 hour time point using a commercially available kit (Cayman Chemicals, Ann Arbor, MI).

# Supplementary Figure 2. Original images 4C

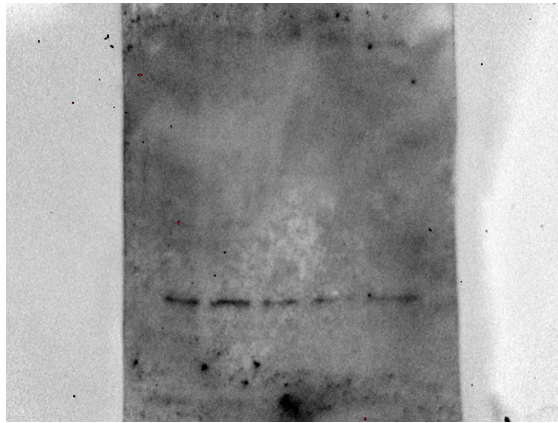

p-Threonine Occludin

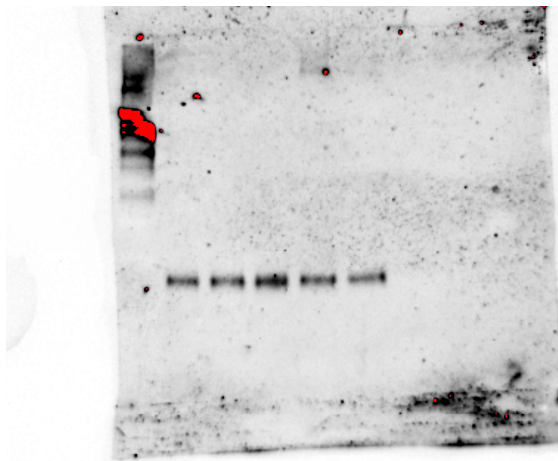

Total Occludin

# Supplementary Figure 3. Original Images 1C

Actin membrane

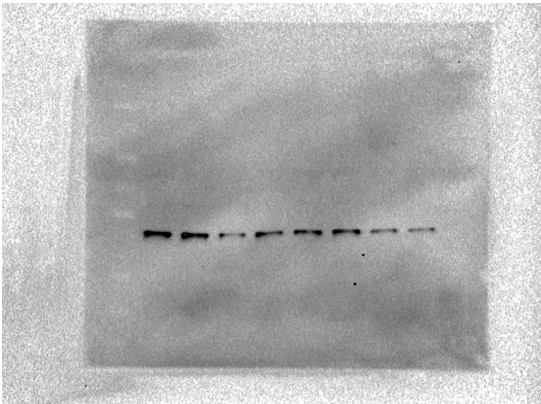

PP2Ac membrane

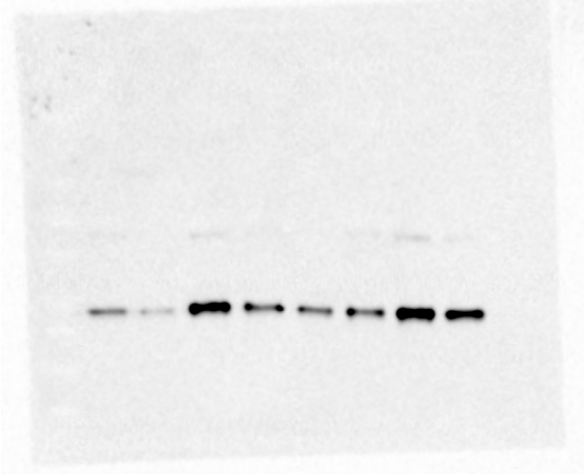

# Supplementary Figure 4.

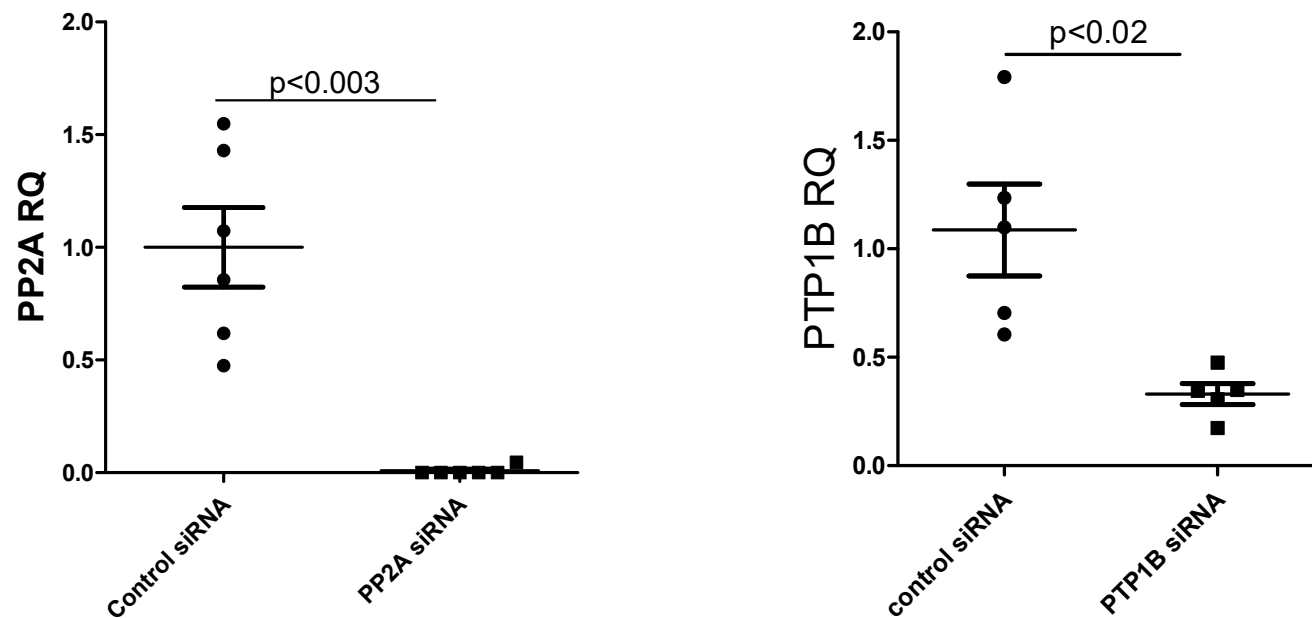

**Supplementary Figure 4. The effect of PP2A and PTP1B silencing.** Human microvascular endothelial cells were treated with control siRNA, PP2A siRNA or PTP1B siRNA for 24 hours. RT-PCR using specific primers for PP2A<sub>C</sub> or PTP1B was conducted on mRNA isolated from the cells. Data is expressed on the y-axis as relative expression.

# Supplementary Figure 5

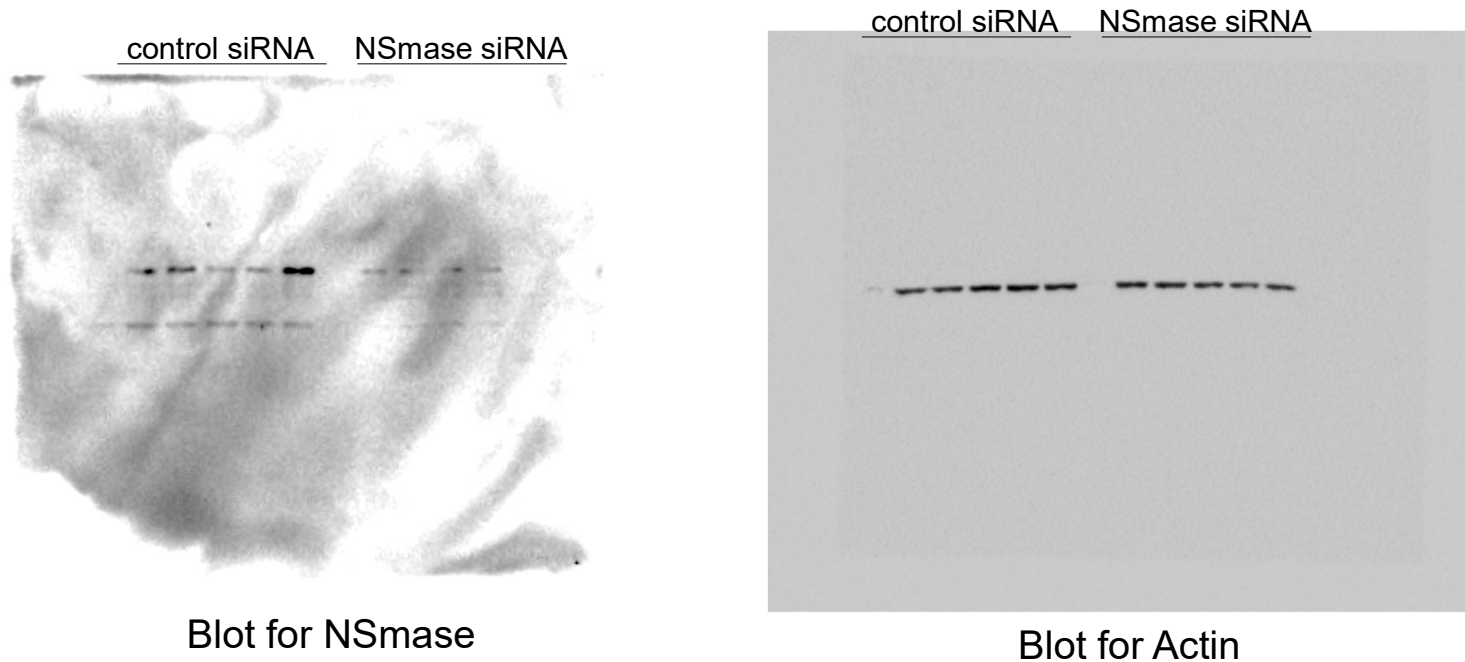

**Supplementary Figure 5. The effect of Nsmase silencing.** Human microvascular endothelial cells were treated with control siRNA or Nsmase siRNA for 24 hours. Immunoblots for Nsmase and Actin were conducted on the cell lysate protein.
